# Supplementary figures and images for: Behavioural and neural signatures of perceptual decision-making are modulated by pupil-linked arousal
Source: eLife journal article supplement (doi:10.7554/elife.42541), 2019-03-18

A

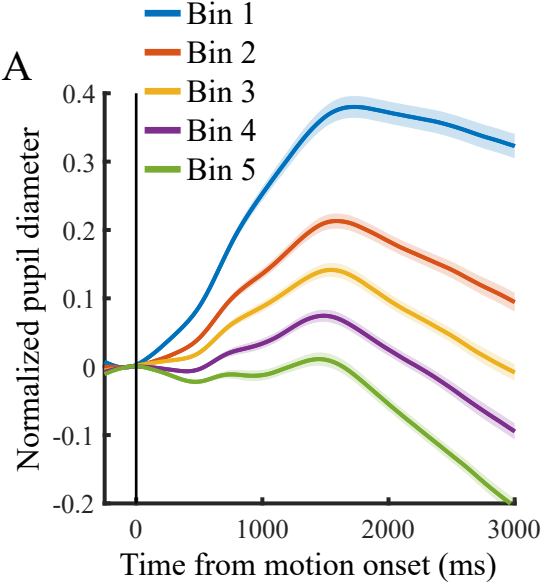

B

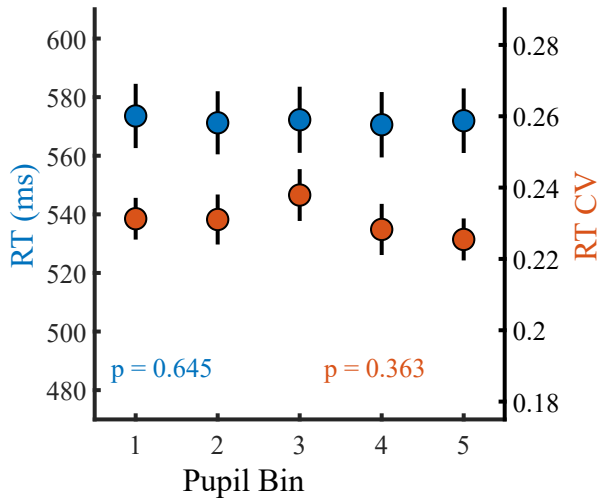

Supplement: supp [file elife-42541-supp-v1.zip]

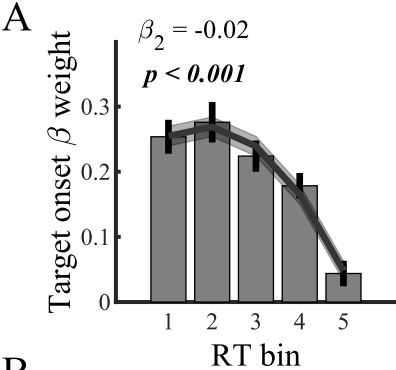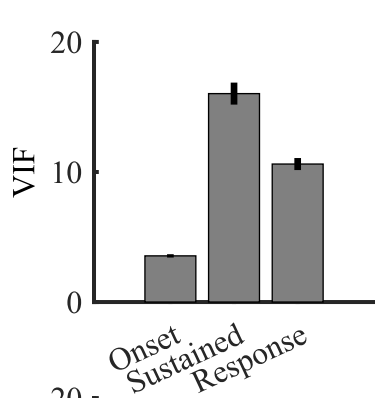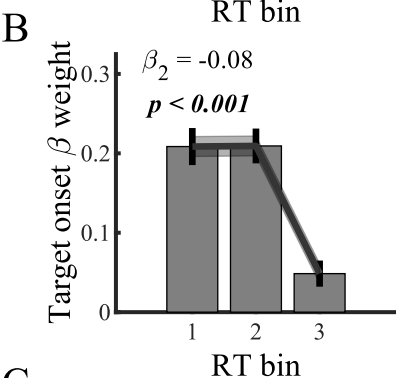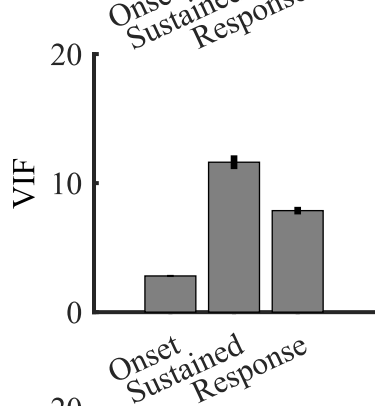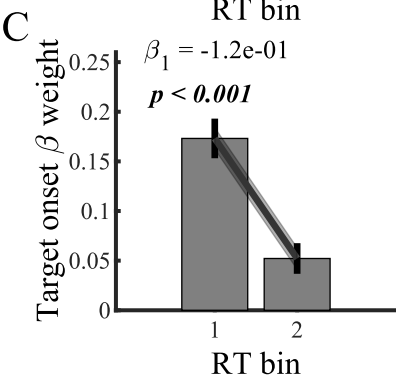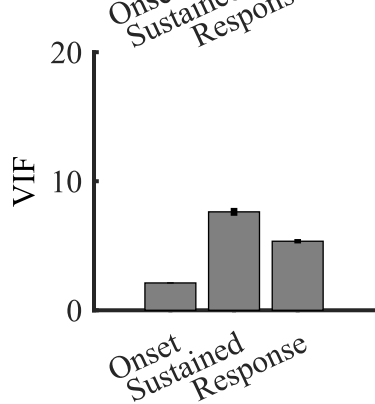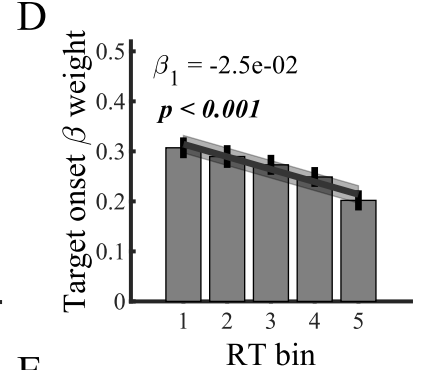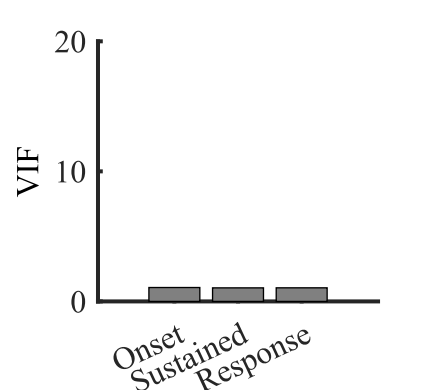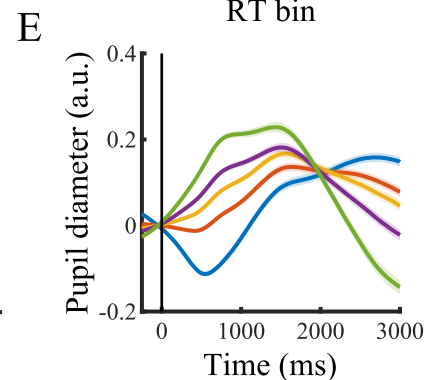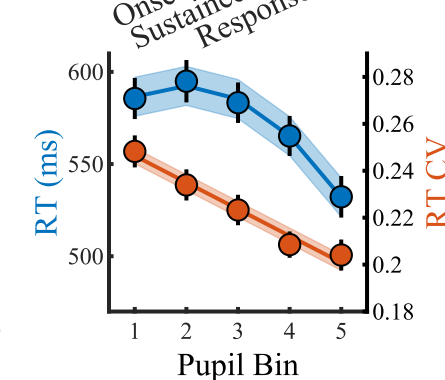

Supplement: supp [file elife-42541-supp-v1.zip]

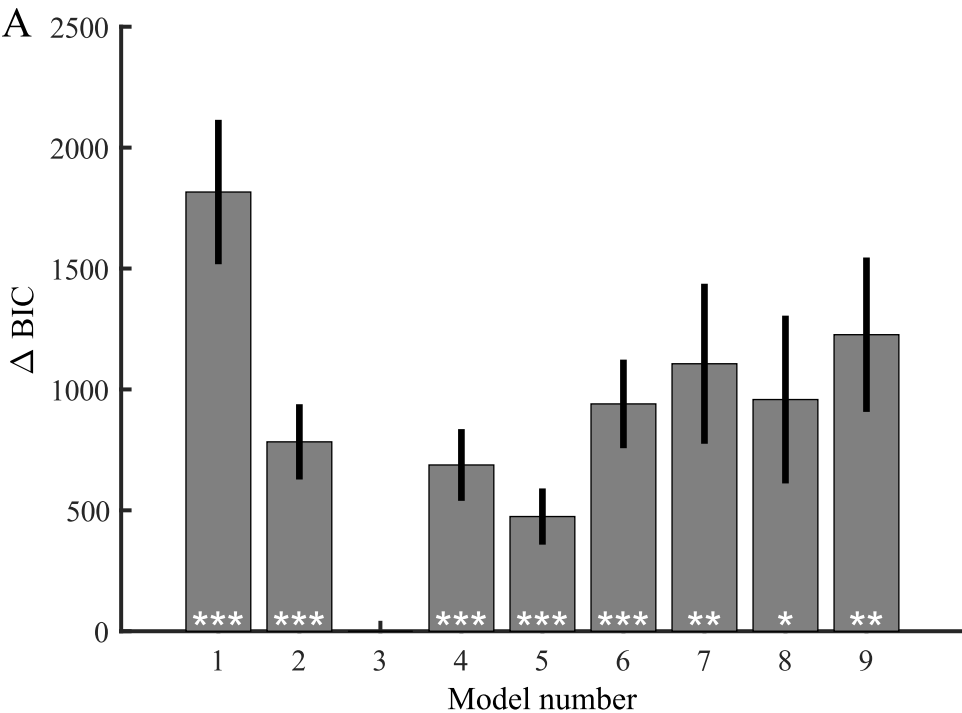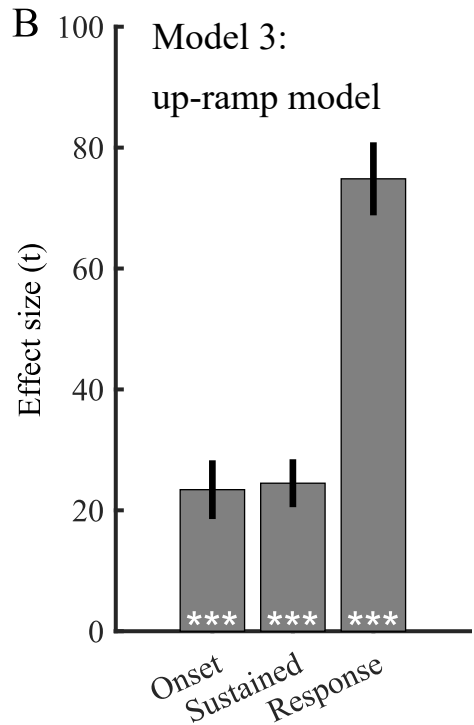

Supplement: supp [file elife-42541-supp-v1.zip]

A

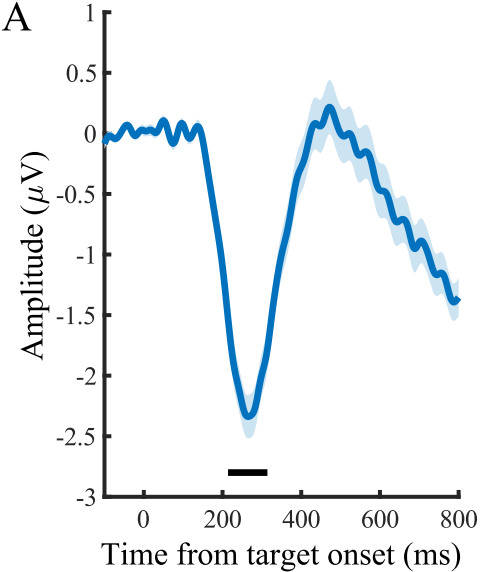

B

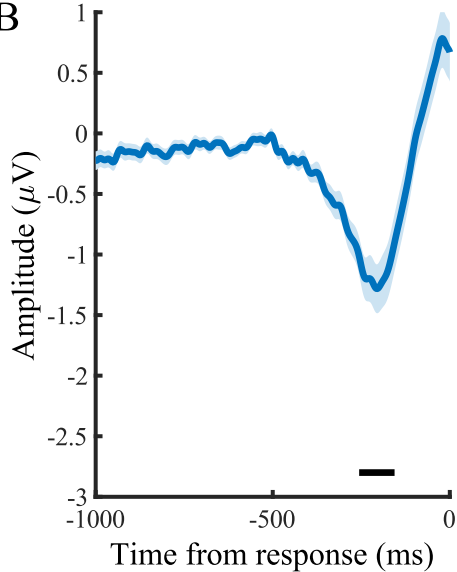

C

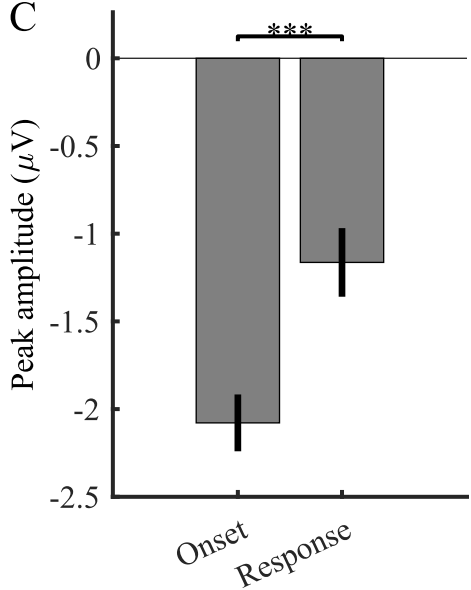

Supplement: supp [file elife-42541-supp-v1.zip]

A

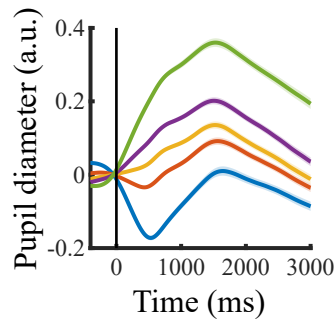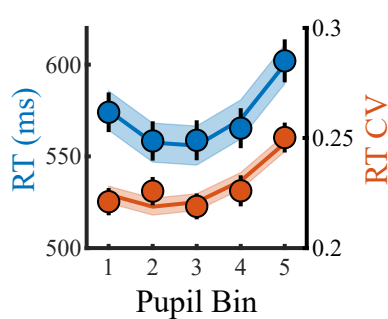

D

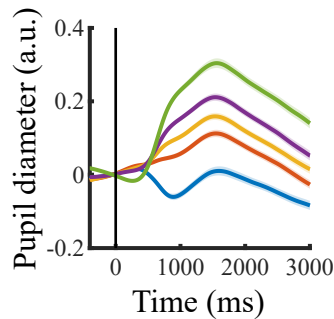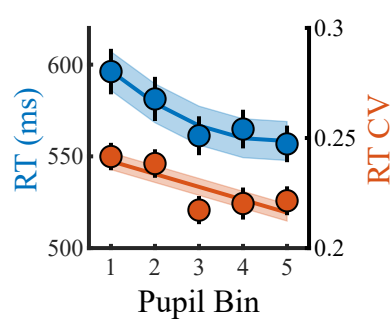

B

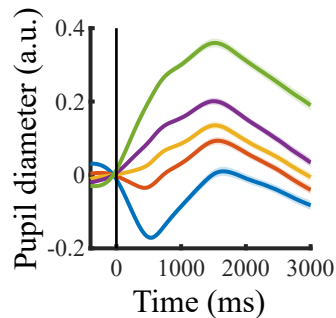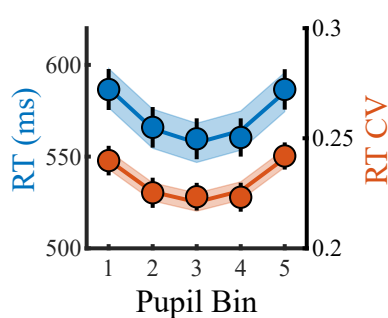

E

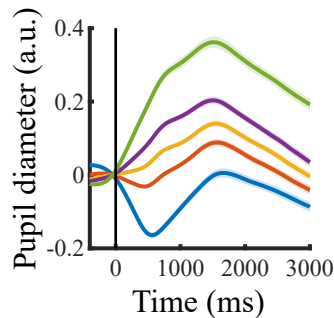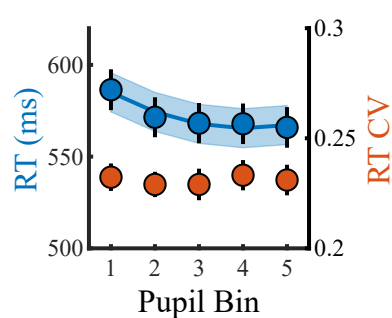

C

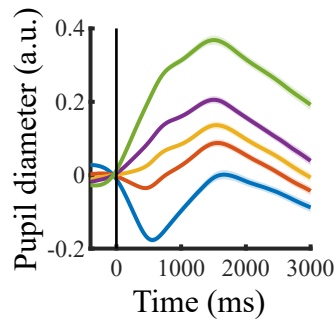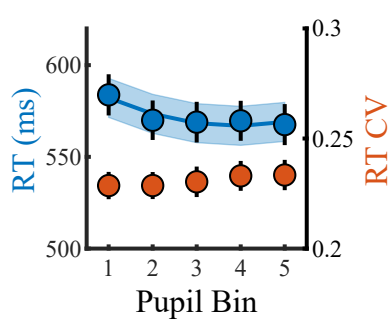

Supplement: supp [file elife-42541-supp-v1.zip]

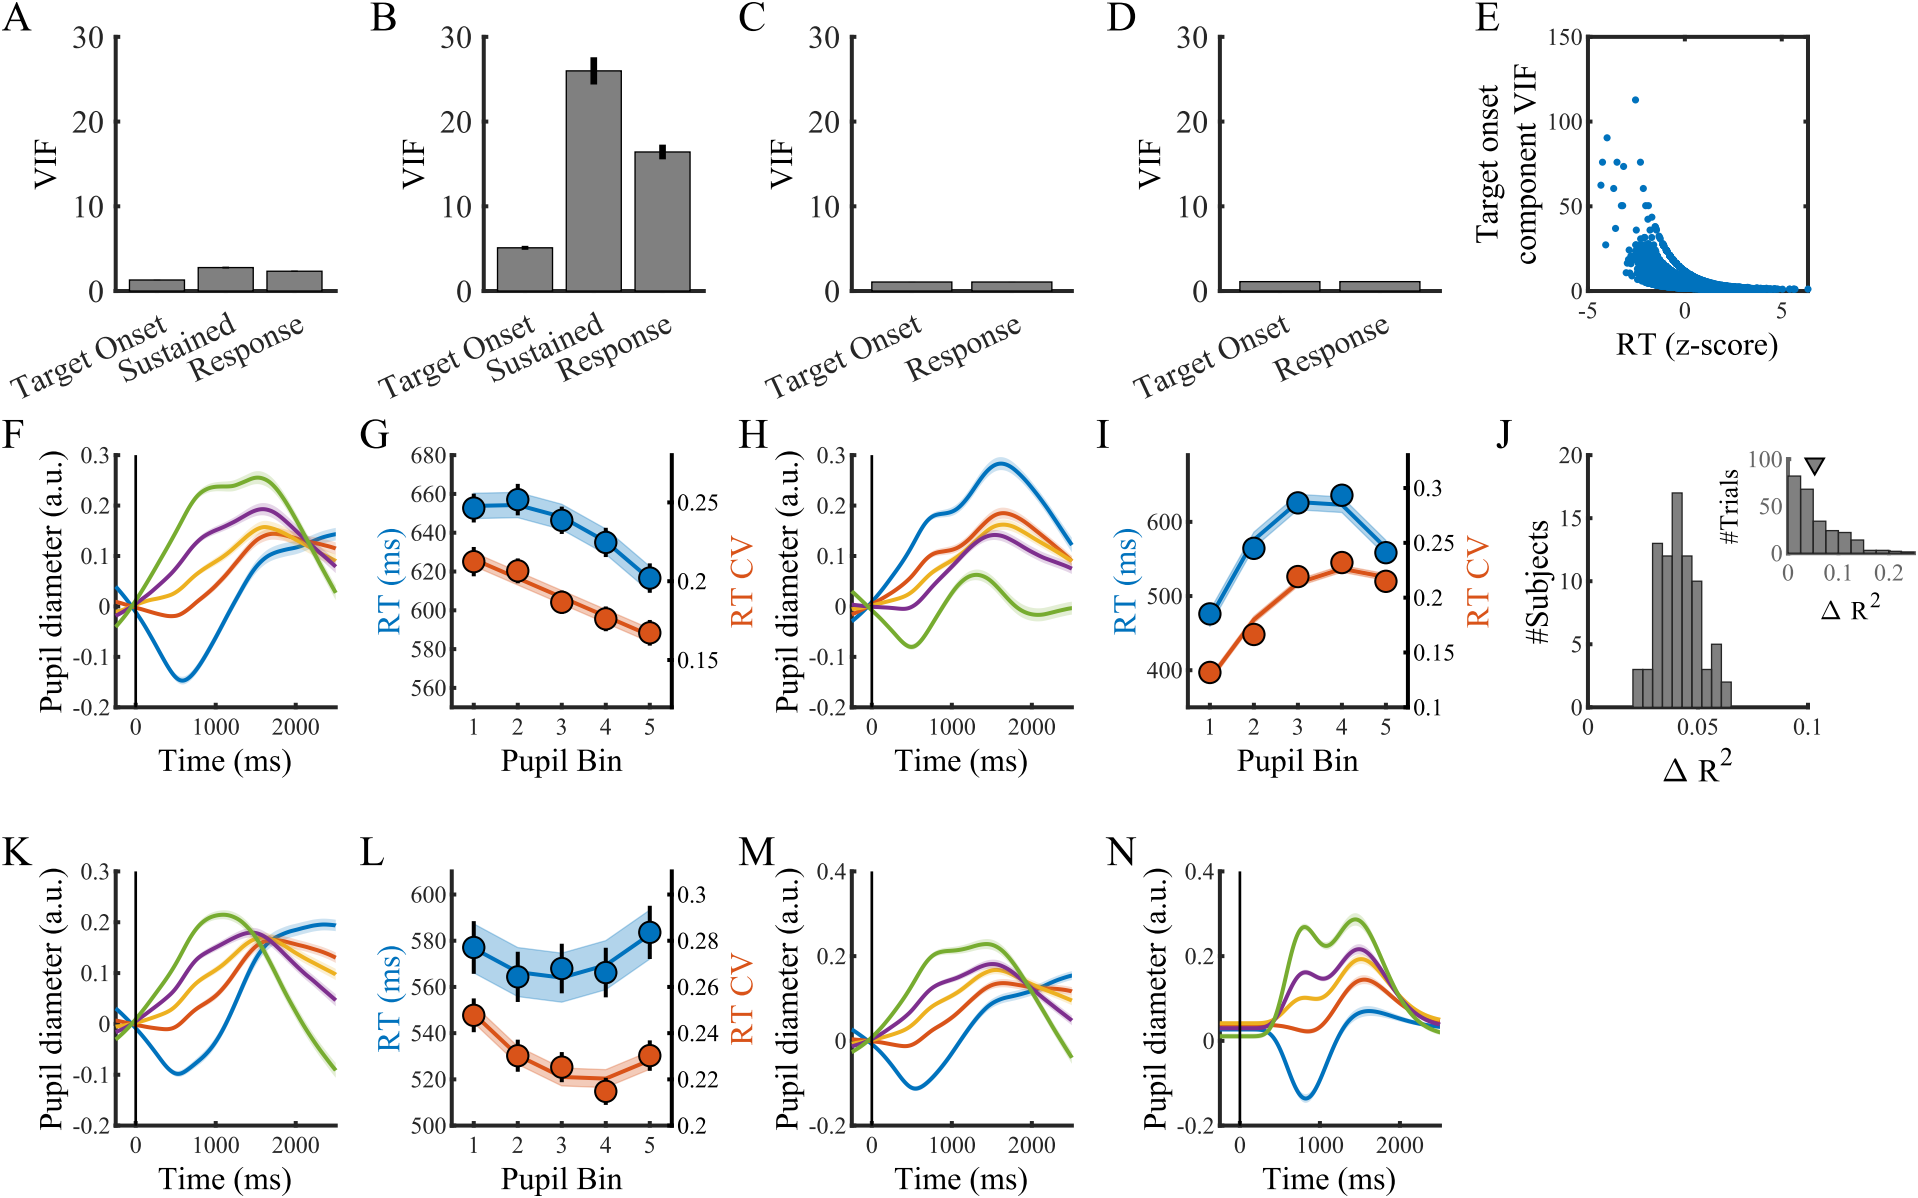

Supplement: supp [file elife-42541-supp-v1.zip]

A

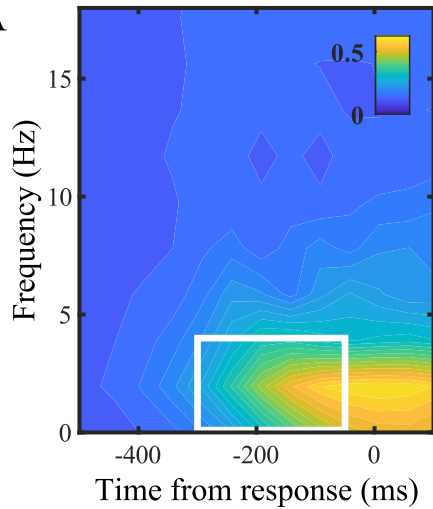

B

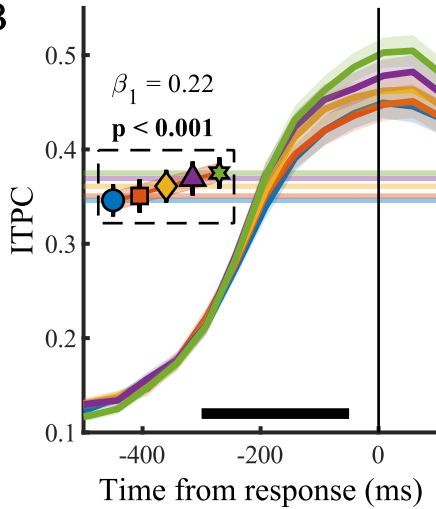

C

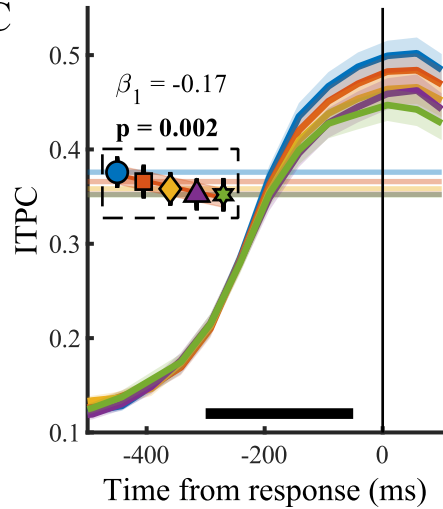

Supplement: supp [file elife-42541-supp-v1.zip]

A

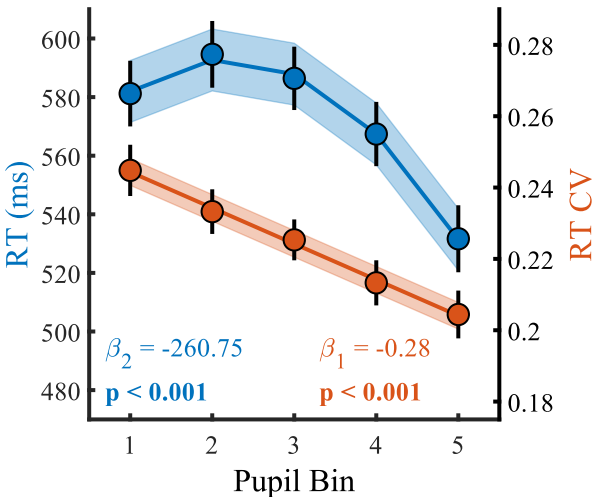

B

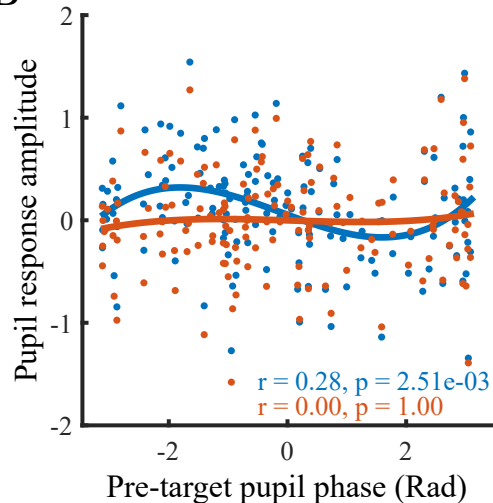

C

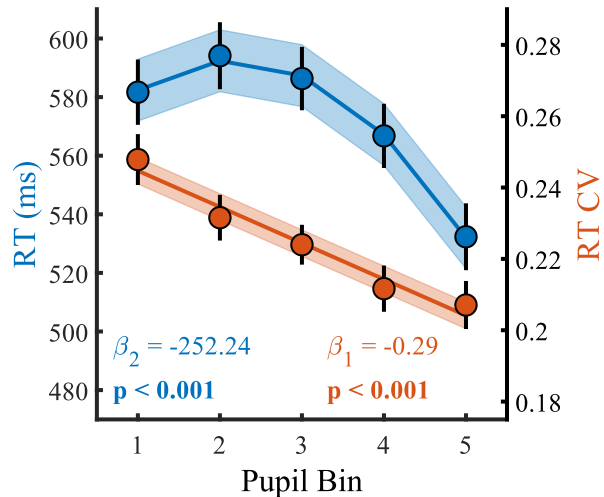

Supplement: supp [file elife-42541-supp-v1.zip]

A

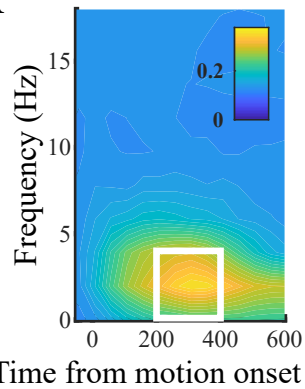

B

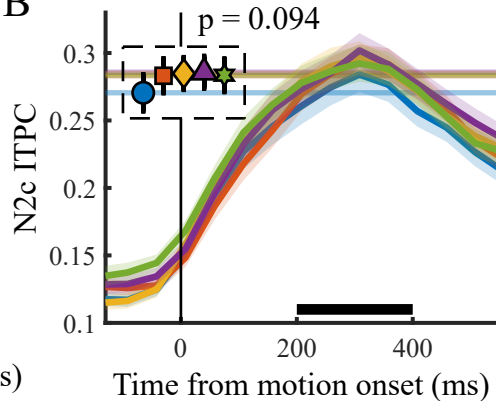

C

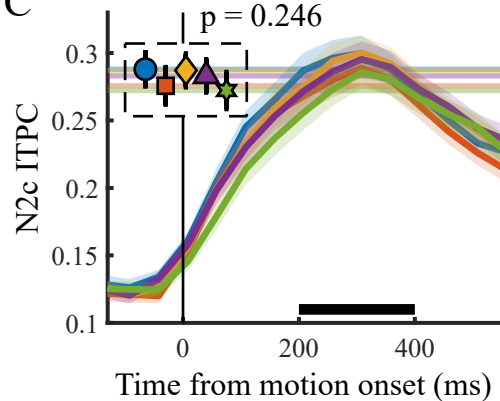

D

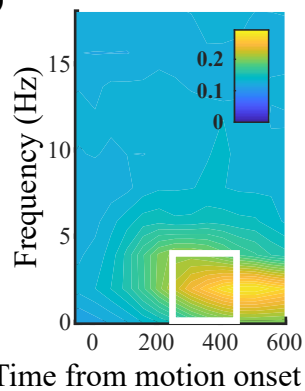

E

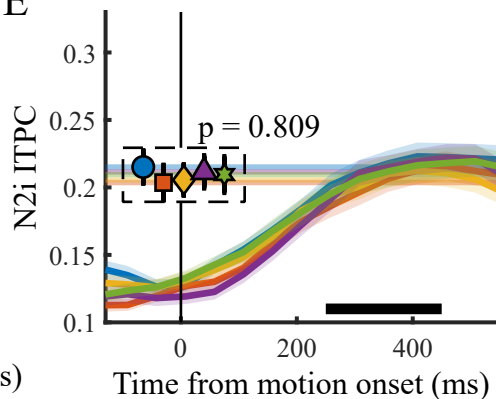

F

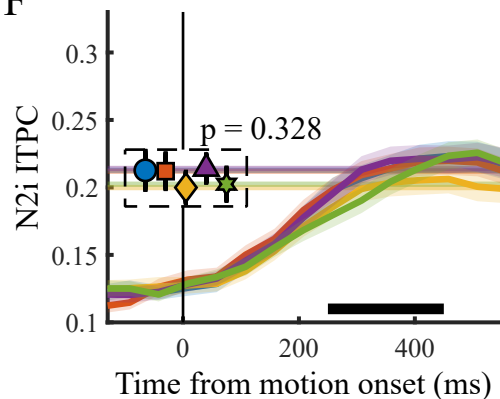

Supplement: supp [file elife-42541-supp-v1.zip]
